# Supplementary material
Source: PubMed Central journal article supplement (PMC5367157)

Suppl. Figure 1  
Ross, et. al.

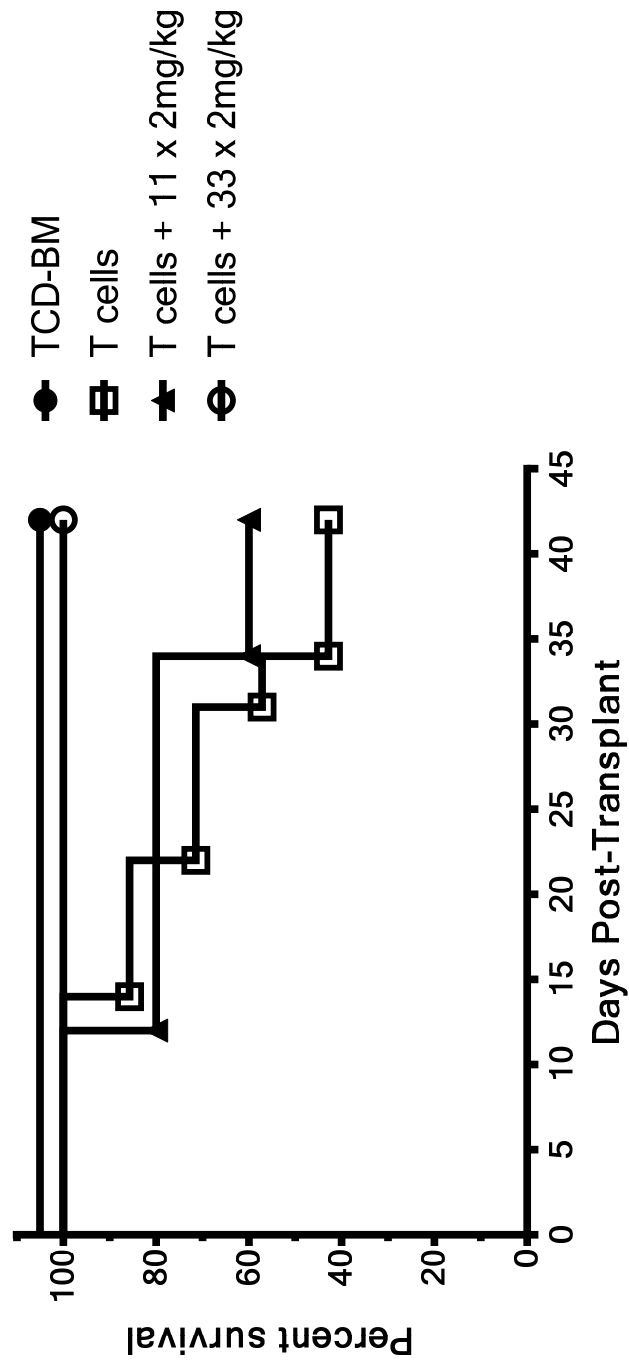

Supplement: NIHMS508421-supplement-01.pdf [file NIHMS508421-supplement-01.pdf]

**Suppl. Figure 2**  
**Ross, et. al.**

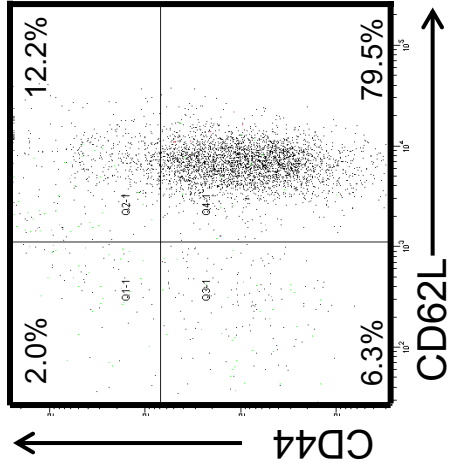

Supplement: NIHMS508421-supplement-02.pdf [file NIHMS508421-supplement-02.pdf]
